# Supplementary material for: Longitudinal relationship between social and CVD risk factors in older adults with prediabetes: the HRS 2006-2016
Source: publisher site journal article supplement (doi:10.18632/aging.206308), 2025-08-26
Supplement: Supplementary file [file aging-v17-206308-supplementary-material-SD1.pdf]

## SUPPLEMENTARY TABLES

**Supplementary Table 1. Adjusted mixed effects linear regression for relationship between social risk domains and glycemic control.**

|                                                       | <b>Model 1<sup>2</sup></b><br>B coefficient (95%<br>confidence interval) | <b>Model 2<sup>3</sup></b><br>B coefficient (95%<br>confidence interval) | <b>Model 3<sup>4</sup></b><br>B coefficient (95%<br>confidence interval) |
|-------------------------------------------------------|--------------------------------------------------------------------------|--------------------------------------------------------------------------|--------------------------------------------------------------------------|
| <b>Economic stability</b>                             |                                                                          |                                                                          |                                                                          |
| Medication cost-related nonadherence                  | <b>0.03 (0.005, 0.06) *</b>                                              | <b>0.03 (0.002, 0.06) *</b>                                              | <b>0.03 (0.002, 0.06) *</b>                                              |
| Difficulty paying bills                               | -0.001 (-0.02, 0.02)                                                     | -0.004 (-0.02, 0.01)                                                     | -0.01 (-0.02, 0.01)                                                      |
| Lowest-quartile income or assets                      | <b>0.05 (0.03, 0.07) ***</b>                                             | <b>0.03 (0.01, 0.05) ***</b>                                             | 0.01 (-0.01, 0.03)                                                       |
| Employment adversity                                  | -0.02 (-0.04, 0.01)                                                      | -0.02 (-0.04, 0.01)                                                      | -0.02 (-0.05, 0.003)                                                     |
| <b>Neighborhood or built environment</b>              |                                                                          |                                                                          |                                                                          |
| Food insecurity                                       | 0.02 (-0.02, 0.06)                                                       | 0.00 (-0.04, 0.04)                                                       | -0.01 (-0.05, 0.03)                                                      |
| Neighborhood physical disorder                        | <b>0.03 (0.01, 0.05) **</b>                                              | 0.02 (-0.001, 0.04)                                                      | 0.01 (-0.01, 0.03)                                                       |
| Lack of neighborhood social cohesion                  | 0.01 (-0.01, 0.04)                                                       | 0.01 (-0.02, 0.03)                                                       | -0.003 (-0.03, 0.02)                                                     |
| Adverse social support                                | 0.003 (-0.01, 0.02)                                                      | -0.001 (-0.02, 0.02)                                                     | 0.002 (-0.02, 0.02)                                                      |
| <b>Education access</b>                               |                                                                          |                                                                          |                                                                          |
| Limited education                                     | <b>0.07 (0.05, 0.09) ***</b>                                             | <b>0.06 (0.04, 0.08) ***</b>                                             | <b>0.03 (0.01, 0.06) ***</b>                                             |
| <b>Health care access</b>                             |                                                                          |                                                                          |                                                                          |
| Lack of health insurance                              | -0.02 (-0.04, 0.00)                                                      | <b>-0.03 (-0.05, -0.01) **</b>                                           | -0.01 (-0.04, 0.01)                                                      |
| <b>Social or community context</b>                    |                                                                          |                                                                          |                                                                          |
| Depression                                            | 0.02 (-0.01, 0.04)                                                       | 0.002 (-0.02, 0.02)                                                      | -0.004 (-0.03, 0.02)                                                     |
| Perceived everyday discrimination                     | 0.01 (-0.01, 0.03)                                                       | 0.01 (-0.01, 0.03)                                                       | 0.01 (-0.01, 0.02)                                                       |
| <b>Covariates</b>                                     |                                                                          |                                                                          |                                                                          |
| High blood pressure                                   | -                                                                        | -                                                                        | <b>0.03 (0.01, 0.04) ***</b>                                             |
| Cancer                                                | -                                                                        | -                                                                        | <b>0.03 (0.01, 0.05) **</b>                                              |
| Lung disease                                          | -                                                                        | -                                                                        | <b>0.04 (0.01, 0.06) **</b>                                              |
| Heart disease                                         | -                                                                        | -                                                                        | <b>0.02 (0.003, 0.04) *</b>                                              |
| Stroke                                                | -                                                                        | -                                                                        | 0.03 (-0.001, 0.06)                                                      |
| Emotional or psychiatric problems                     | -                                                                        | -                                                                        | -0.01 (-0.03, 0.01)                                                      |
| Arthritis                                             | -                                                                        | -                                                                        | -0.01 (-0.02, 0.01)                                                      |
| <b>Age, year (Ref: 50-59)</b>                         |                                                                          |                                                                          |                                                                          |
| 60-74                                                 | -                                                                        | -                                                                        | -0.01 (-0.03, 0.01)                                                      |
| ≥75                                                   | -                                                                        | -                                                                        | <b>0.04 (0.02, 0.06) ***</b>                                             |
| <b>Race and ethnicity (Ref: Non-Hispanic White)</b>   |                                                                          |                                                                          |                                                                          |
| Non-Hispanic Black                                    | -                                                                        | -                                                                        | <b>0.12 (0.10, 0.14) ***</b>                                             |
| Other                                                 | -                                                                        | -                                                                        | <b>0.08 (0.05, 0.10) ***</b>                                             |
| <b>Married or living with a partner (Ref: single)</b> | -                                                                        | -                                                                        | -0.004 (-0.02, 0.01)                                                     |
| <b>Sex (Ref: Male)</b>                                |                                                                          |                                                                          | <b>-0.02 (-0.03, -0.002) *</b>                                           |

<sup>1</sup>\*p-value <0.05; \*\*p-value <0.01; \*\*\* p-value <0.001.

<sup>2</sup>This model includes five separate individual models, each containing only one of the social risk factors.

<sup>3</sup>This model includes all five social risk factors together.

<sup>4</sup>This model includes all five social risk factors along with covariates.

**Supplementary Table 2. Adjusted mixed effects linear regression for relationship between social risk domains and systolic blood pressure.**

|                                                       | <b>Model 1<sup>2</sup></b><br>B coefficient (95%<br>confidence interval) | <b>Model 2<sup>3</sup></b><br>B coefficient (95%<br>confidence interval) | <b>Model 3<sup>4</sup></b><br>B coefficient (95%<br>confidence interval) |
|-------------------------------------------------------|--------------------------------------------------------------------------|--------------------------------------------------------------------------|--------------------------------------------------------------------------|
| <b>Economic stability</b>                             |                                                                          |                                                                          |                                                                          |
| Medication cost-related nonadherence                  | -0.63 (-1.99, 0.73)                                                      | -0.48 (-1.86, 0.89)                                                      | -0.01 (-1.38, 1.35)                                                      |
| Difficulty paying bills                               | -0.86 (-1.78, 0.07)                                                      | -0.69 (-1.63, 0.26)                                                      | -0.22 (-1.15, 0.72)                                                      |
| Lowest-quartile income or assets                      | <b>1.45 (0.31, 2.59) *</b>                                               | 0.75 (-0.43, 1.94)                                                       | 0.33 (-0.88, 1.55)                                                       |
| Employment adversity                                  | <b>-1.59 (-2.99, -0.17) *</b>                                            | -1.23 (-2.66, 0.20)                                                      | -0.45 (-1.89, 0.98)                                                      |
| <b>Neighborhood or built environment</b>              |                                                                          |                                                                          |                                                                          |
| Food insecurity                                       | -0.61 (-2.59, 1.36)                                                      | -0.09 (-2.16, 1.97)                                                      | 0.30 (-1.74, 2.33)                                                       |
| Neighborhood physical disorder                        | 0.16 (-1.02, 1.34)                                                       | -0.12 (-1.31, 1.06)                                                      | -0.44 (-1.61, 0.74)                                                      |
| Lack of neighborhood social cohesion                  | 0.55 (-0.66, 1.75)                                                       | 0.60 (-0.61, 1.81)                                                       | 0.66 (-0.53, 1.86)                                                       |
| Adverse social support                                | -0.76 (-1.70, 0.18)                                                      | -0.39 (-1.36, 0.57)                                                      | 0.16 (-0.79, 1.11)                                                       |
| <b>Education access</b>                               |                                                                          |                                                                          |                                                                          |
| Limited education                                     | <b>4.85 (3.50, 6.20) ***</b>                                             | <b>5.03 (3.64, 6.42) ***</b>                                             | <b>4.34 (2.96, 5.71) ***</b>                                             |
| <b>Health care access</b>                             |                                                                          |                                                                          |                                                                          |
| Lack of health insurance                              | <b>-2.17 (-3.35, -0.98) ***</b>                                          | <b>-2.01 (-3.21, -0.82) **</b>                                           | 0.14 (-1.10, 1.37)                                                       |
| <b>Social or community context</b>                    |                                                                          |                                                                          |                                                                          |
| Depression                                            | -1.01 (-2.21, 0.18)                                                      | -1.12 (-2.34, 0.11)                                                      | -0.85 (-2.09, 0.39)                                                      |
| Perceived everyday discrimination                     | <b>-1.21 (-2.14, -0.28) **</b>                                           | <b>-0.98 (-1.94, -0.03) *</b>                                            | -0.66 (-1.61, 0.29)                                                      |
| <b>Covariates</b>                                     |                                                                          |                                                                          |                                                                          |
| High blood pressure                                   | -                                                                        | -                                                                        | <b>4.87 (3.98, 5.77) ***</b>                                             |
| Cancer                                                | -                                                                        | -                                                                        | <b>-1.30 (-2.50, -0.10) *</b>                                            |
| Lung disease                                          | -                                                                        | -                                                                        | <b>-1.66 (-3.07, -0.25) *</b>                                            |
| Heart disease                                         | -                                                                        | -                                                                        | <b>-3.47 (-4.50, -2.43) ***</b>                                          |
| Stroke                                                | -                                                                        | -                                                                        | 0.12 (-1.74, 1.98)                                                       |
| Emotional or psychiatric problems                     | -                                                                        | -                                                                        | -0.71 (-1.95, 0.54)                                                      |
| Arthritis                                             | -                                                                        | -                                                                        | -0.15 (-1.07, 0.77)                                                      |
| <b>Age, year (Ref: 50-59)</b>                         |                                                                          |                                                                          |                                                                          |
| 60-74                                                 | -                                                                        | -                                                                        | <b>3.18 (2.14, 4.22) ***</b>                                             |
| ≥75                                                   | -                                                                        | -                                                                        | <b>6.85 (5.55, 8.16) ***</b>                                             |
| <b>Race and ethnicity (Ref: Non-Hispanic White)</b>   |                                                                          |                                                                          |                                                                          |
| Non-Hispanic Black                                    | -                                                                        | -                                                                        | <b>3.43 (2.00, 4.86) ***</b>                                             |
| Other                                                 | -                                                                        | -                                                                        | <b>-2.27 (-3.80, -0.74) **</b>                                           |
| <b>Married or living with a partner (Ref: single)</b> |                                                                          |                                                                          |                                                                          |
|                                                       | -                                                                        | -                                                                        | <b>-1.13 (-2.11, -0.15) *</b>                                            |
| <b>Sex (Ref: Male)</b>                                |                                                                          |                                                                          |                                                                          |
|                                                       |                                                                          |                                                                          | <b>-4.29 (-5.29, -3.29) ***</b>                                          |

<sup>1</sup>\*p-value <0.05; \*\*p-value <0.01; \*\*\* p-value <0.001.

<sup>2</sup>This model includes five separate individual models, each containing only one of the social risk factors.

<sup>3</sup>This model includes all five social risk factors together.

<sup>4</sup>This model includes all five social risk factors along with covariates.

**Supplementary Table 3. Adjusted mixed effects linear regression for relationship between social risk domains and cholesterol ratio.**

|                                                       | <b>Model 1<sup>2</sup></b><br>B coefficient (95%<br>confidence interval) | <b>Model 2<sup>3</sup></b><br>B coefficient (95%<br>confidence interval) | <b>Model 3<sup>4</sup></b><br>B coefficient (95%<br>confidence interval) |
|-------------------------------------------------------|--------------------------------------------------------------------------|--------------------------------------------------------------------------|--------------------------------------------------------------------------|
| <b>Economic stability</b>                             |                                                                          |                                                                          |                                                                          |
| Medication cost-related nonadherence                  | -0.001 (-0.09, 0.08)                                                     | -0.02 (-0.11, 0.06)                                                      | 0.02 (-0.07, 0.11)                                                       |
| Difficulty paying bills                               | <b>0.10 (0.05, 0.16) ***</b>                                             | <b>0.07 (0.01, 0.13) *</b>                                               | <b>0.08 (0.02, 0.13) *</b>                                               |
| Lowest-quartile income or assets                      | <b>0.09 (0.02, 0.16) **</b>                                              | 0.06 (-0.01, 0.13)                                                       | <b>0.12 (0.04, 0.19) **</b>                                              |
| Employment adversity                                  | <b>0.11 (0.02, 0.19) *</b>                                               | 0.07 (-0.02, 0.16)                                                       | 0.05 (-0.04, 0.14)                                                       |
| <b>Neighborhood or built environment</b>              |                                                                          |                                                                          |                                                                          |
| Food insecurity                                       | 0.11 (-0.01, 0.23)                                                       | 0.01 (-0.11, 0.14)                                                       | 0.03 (-0.10, 0.15)                                                       |
| Neighborhood physical disorder                        | -0.03 (-0.10, 0.05)                                                      | -0.05 (-0.12, 0.02)                                                      | -0.04 (-0.11, 0.04)                                                      |
| Lack of neighborhood social cohesion                  | <b>0.10 (0.03, 0.18) **</b>                                              | 0.07 (-0.01, 0.14)                                                       | 0.08 (-0.00, 0.15)                                                       |
| Adverse social support                                | <b>0.08 (0.02, 0.13) **</b>                                              | 0.04 (-0.02, 0.10)                                                       | 0.02 (-0.04, 0.08)                                                       |
| <b>Education access</b>                               |                                                                          |                                                                          |                                                                          |
| Limited education                                     | <b>0.13 (0.05, 0.20) **</b>                                              | <b>0.08 (0.01, 0.16) *</b>                                               | <b>0.08 (0.01, 0.16) *</b>                                               |
| <b>Health care access</b>                             |                                                                          |                                                                          |                                                                          |
| Lack of health insurance                              | <b>0.29 (0.22, 0.37) ***</b>                                             | <b>0.26 (0.19, 0.33) ***</b>                                             | <b>0.22 (0.15, 0.30) ***</b>                                             |
| <b>Social or community context</b>                    |                                                                          |                                                                          |                                                                          |
| Depression                                            | 0.03 (-0.04, 0.11)                                                       | -0.03 (-0.10, 0.05)                                                      | 0.03 (-0.05, 0.11)                                                       |
| Perceived everyday discrimination                     | <b>0.10 (0.04, 0.16) **</b>                                              | <b>0.06 (-0.001, 0.12) *</b>                                             | 0.03 (-0.03, 0.09)                                                       |
| <b>Covariates</b>                                     |                                                                          |                                                                          |                                                                          |
| High blood pressure                                   | -                                                                        | -                                                                        | -0.01 (-0.06, 0.04)                                                      |
| Cancer                                                | -                                                                        | -                                                                        | -0.05 (-0.12, 0.02)                                                      |
| Lung disease                                          | -                                                                        | -                                                                        | -0.00 (-0.08, 0.08)                                                      |
| Heart disease                                         | -                                                                        | -                                                                        | <b>-0.15 (-0.21, -0.09) ***</b>                                          |
| Stroke                                                | -                                                                        | -                                                                        | -0.06 (-0.17, 0.05)                                                      |
| Emotional or psychiatric problems                     | -                                                                        | -                                                                        | -0.005 (-0.08, 0.07)                                                     |
| Arthritis                                             | -                                                                        | -                                                                        | 0.01 (-0.04, 0.07)                                                       |
| <b>Age, year (Ref: 50-59)</b>                         |                                                                          |                                                                          |                                                                          |
| 60-74                                                 | -                                                                        | -                                                                        | 0.03 (-0.03, 0.09)                                                       |
| ≥75                                                   | -                                                                        | -                                                                        | <b>-0.09 (-0.17, -0.01) *</b>                                            |
| <b>Race and ethnicity (Ref: Non-Hispanic White)</b>   |                                                                          |                                                                          |                                                                          |
| Non-Hispanic Black                                    | -                                                                        | -                                                                        | <b>-0.12 (-0.20, -0.04) **</b>                                           |
| Other                                                 | -                                                                        | -                                                                        | 0.03 (-0.05, 0.12)                                                       |
| <b>Married or living with a partner (Ref: single)</b> | -                                                                        | -                                                                        | 0.02 (-0.04, 0.08)                                                       |
| <b>Sex (Ref: Male)</b>                                |                                                                          |                                                                          | <b>-0.37 (-0.43, -0.32) ***</b>                                          |

<sup>1</sup>\*p-value <0.05; \*\*p-value <0.01; \*\*\* p-value <0.001.

<sup>2</sup>This model includes five separate individual models, each containing only one of the social risk factors.

<sup>3</sup>This model includes all five social risk factors together.

<sup>4</sup>This model includes all five social risk factors along with covariates.
